# Supplementary material for: On the Prevalence and Roles of Proteins Undergoing Liquid-Liquid Phase Separation in the PML Body Biogenesis
Source: Preprints.org preprint supplement (doi:10.20944/preprints202310.1400.v1), 2023-10-23
Supplement: Supplementary file 3 [file Table S1.xlsx]

## Sheet: data
№	Uniprot ID	Uniprot Name	Colocalization type	Links (DOI, ISSN):
1	Q8IZQ1	WDFY3_HUMAN	+	10.4161/auto.6.3.11226
2	Q13137	CACO2_HUMAN	+	10.1083/jcb.130.1.1
3	Q5VWP3	MLIP_HUMAN	+	10.1074/jbc.M110.165548
4	Q6NT76	HMBX1_HUMAN	+	10.1242/jcs.128512
5	Q9Y252	RNF6_HUMAN	+	10.1128/MCB.22.10.3488–3496.2002
6	O95361	TRI16_HUMAN	+	10.1074/jbc.M600879200
7	Q92769	HDAC2_HUMAN	+	10.1091/mbc.e07-11-1203
8	P80723	BASP1_HUMAN	+	10.1093/nar/gkn955
9	G2XKQ0	SUMO5_HUMAN	+	10.1038/srep26509
10	Q9H254	SPTN4_HUMAN	+	10.1074/jbc.M009307200
11	Q96IZ0	PAWR_HUMAN	+	10.1038/sj.onc.1206271
12	Q9NVV9	THAP1_HUMAN	+	10.1038/sj.onc.1206271
13	P49959	MRE11_HUMAN	+	10.4161/cc.4.7.1830
14	O00327	BMAL1_HUMAN	+	10.1128/MCB.00583-08
15	Q9Y4E5	ZN451_HUMAN	+	10.1016/j.jmb.2008.07.016
16	O96017	CHK2_HUMAN	+	10.1038/ncb869
17	Q9UBK2	PRGC1_HUMAN	+	10.1074/jbc.M703634200
18	O00716	E2F3_HUMAN	+	10.1101/gad.1975111
19	O15055	PER2_HUMAN	+	10.1038/emboj.2012.1
20	O15169	AXIN1_HUMAN	+	10.1038/onc.2010.499
21	O15265	ATX7_HUMAN	+	10.1093/hmg/8.9.1657
22	O43684	BUB3_HUMAN	+	10.1038/s41467-019-13808-9
23	O60563	CCNT1_HUMAN	+	10.1093/emboj/cdg205
24	O60934	NBN_HUMAN	+	10.1074/jbc.C000390200
25	O75376	NCOR1_HUMAN	+	10.1016/s1097-2765(01)00257-x
26	O75925	PIAS1_HUMAN	+	10.1101/612622	10.1128/JVI.00426-16
27	O95551	TYDP2_HUMAN	+	10.1016/j.bbrc.2008.08.023	10.1038/cdd.2011.118
28	O95644	NFAC1_HUMAN	+	10.1074/jbc.M900465200
29	P01106	MYC_HUMAN	+	10.1038/sj.onc.1208338
30	P02545	LMNA_HUMAN	+	10.1038/s41419-022-05491-4
31	P04637	P53_HUMAN	+	10.1093/emboj/19.22.6185
32	P05067	A4_HUMAN	+	10.1186/s40478-021-01174-x
33	P06400	RB_HUMAN	+	10.1128/mcb.18.2.1084
34	P06730	IF4E_HUMAN	+	10.1093/emboj/20.16.4547	10.1006/jmbi.2001.5003
35	P10242	MYB_HUMAN	+	10.1016/j.yexcr.2004.03.014
36	P11831	SRF_HUMAN	+	10.1016/S0006-291X(03)00910-0
37	P12755	SKI_HUMAN	+	10.1016/s1097-2765(01)00257-x
38	P13056	NR2C1_HUMAN	+	10.1371/journal.pone.0004363
39	P14373	TRI27_HUMAN	+	10.1242/jcs.111.10.1319
40	P17947	SPI1_HUMAN	+	10.1128/MCB.02422-06
41	P22736	NR4A1_HUMAN	+	10.1038/sj/onc/1205491
42	P23497	SP100_HUMAN	+	10.1182/blood.V88.4.1423.bloodjournal8841423
43	P28482	MK01_HUMAN	+	10.1074/jbc.M109.032557
44	P29590	PML_HUMAN	+	10.1093/nar/gkaa828
45	P33076	C2TA_HUMAN	+	10.1083/jcb.201112015
46	P41182	BCL6_HUMAN	+	10.1038/sj.onc.1203976	10.1371/journal.pone.0076845
47	P43356	MAGA2_HUMAN	+	10.1038/cdd.2011.173
48	P46063	RECQ1_HUMAN	+	Johnson, F. B., Lombard, D. B., Neff, N. F., Mastrangelo, M. A., Dewolf, W., Ellis, N. A., ... & Guarente, L. (2000). Association of the Bloom syndrome protein with topoisomerase IIIα in somatic and meiotic cells. Cancer research, 60(5), 1162-1167.	Online ISSN: 1538-7445 ; Print ISSN: 0008-5472 ; "Association of the Bloom Syndrome Protein with Topoisomerase IIIα in Somatic and Meiotic Cells"
49	P46695	IEX1_HUMAN	+	10.1074/jbc.M501571200
50	P46937	YAP1_HUMAN	+	10.1038/sj.cdd.4402063	10.1016/j.molcel.2005.04.008
51	P51957	NEK4_HUMAN	+	10.1186/s12953-015-0065-6
52	P54132	BLM_HUMAN	+	10.1159/000056848	10.1242/jcs.02965
53	P54252	ATX3_HUMAN	+	10.1016/j.bbrc.2021.03.098
54	P55854	SUMO3_HUMAN	+	10.1038/sj.onc.1208714
55	P61956	SUMO2_HUMAN	+	10.1038/sj.onc.1208714
56	P63165	SUMO1_HUMAN	+	10.1158/0008-5472.CAN-11-3159
57	P63279	UBC9_HUMAN	+	10.1242/jcs.112.3.381	10.1038/s41467-021-26807-6
58	P78317	RNF4_HUMAN	+	10.1016/j.yexcr.2004.10.029
59	P84243	H33_HUMAN	+	10.1242/jcs.220970
60	Q00613	HSF1_HUMAN	+	10.1074/jbc.M104714200
61	Q01094	E2F1_HUMAN	+	10.1101/gad.1975111
62	Q04206	TF65_HUMAN	+	10.1074/jbc.M211849200	10.1111/cmi.12469 ; 10.1371/journal.ppat.1004705
63	Q05516	ZBT16_HUMAN	+	10.1073/pnas.94.19.10255	10.1016/j.immuni.2009.04.013 ; 10.1038/sj.onc.1203976
64	Q06830	PRDX1_HUMAN	+	10.1091/mbc.E10-02-0160
65	Q08050	FOXM1_HUMAN	+	10.1002/1878-0261.12486
66	Q13164	MK07_HUMAN	+	10.1038/onc.2012.332
67	Q13501	SQSTM_HUMAN	+	10.4161/auto.6.3.11226
68	Q14149	MORC3_HUMAN	+	10.1091/mbc.e06-08-0747	10.1128/JVI.00621-16 ; 10.1242/jcs.063586
69	Q14164	IKKE_HUMAN	+	10.1016/j.molcel.2010.01.018
70	Q15047	SETB1_HUMAN	+	10.1074/jbc.M111.248534
71	Q659A1	ICE2_HUMAN	+	10.1186/s12885-018-4674-1
72	Q6ZU65	UBN2_HUMAN	+	10.1101/2021.11.30.470516
73	Q7Z5L9	I2BP2_HUMAN	+	10.1101/2020.12.28.424528
74	Q8IY18	SMC5_HUMAN	+	10.1038/nsmb1259	10.1091/mbc.E09-04-0309
75	Q8IY92	SLX4_HUMAN	+	10.15252/embr.201440017
76	Q8IYM9	TRI22_HUMAN	+	10.3389/fimmu.2017.00564
77	Q8N726	ARF_HUMAN	+	10.1073/pnas.1507540112
78	Q8NDZ2	SIMC1_HUMAN	+	10.7554/eLife.79676
79	Q8TEE9	SAP25_HUMAN	+	10.1128/MCB.26.4.1386-1397.2006
80	Q8WUI4	HDAC7_HUMAN	+	10.1091/mbc.e07-11-1203	10.1091/mbc.E07-11-1203
81	Q8WXH0	SYNE2_HUMAN	+	10.1074/jbc.M109.032557
82	Q92793	CBP_HUMAN	+	10.1038/35018127	10.1016/S0006-2952(00)00413-5
83	Q92993	KAT5_HUMAN	+	10.3390/cancers14194549	10.1074/jbc.M807590200
84	Q93009	UBP7_HUMAN	+	10.1093/emboj/16.7.1519	10.1038/nature07290
85	Q96EB6	SIR1_HUMAN	+	10.1093/emboj/21.10.2383
86	Q96EP1	CHFR_HUMAN	+	10.1038/nsmb837
87	Q96HI0	SENP5_HUMAN	+	10.1091/mbc.E10-06-0504	10.7150/ijbs.6.51
88	Q96MF7	NSE2_HUMAN	+	10.1038/nsmb1259
89	Q96RE7	NACC1_HUMAN	+	10.1111/cas.12680
90	Q96RU7	TRIB3_HUMAN	+	10.1016/j.ccell.2017.04.006
91	Q96SB8	SMC6_HUMAN	+	10.1038/nsmb1259	10.1371/journal.pone.0169648
92	Q99497	PARK7_HUMAN	+	10.1016/j.freeradbiomed.2012.05.035
93	Q99607	ELF4_HUMAN	+	10.1074/jbc.M312439200
94	Q99856	ARI3A_HUMAN	+	10.1038/sj.cdd.4401412
95	Q99873	ANM1_HUMAN	+	10.4161/cc.4.7.1830
96	Q9BYM8	HOIL1_HUMAN	+	10.1074/jbc.M413476200
97	Q9GZQ8	MLP3B_HUMAN	+	10.1371/journal.pone.0113089	10.15252/emmm.201607315
98	Q9GZR1	SENP6_HUMAN	+	10.1091/mbc.e10-06-0504
99	Q9GZU8	PIP30_HUMAN	+	10.4161/cc.8.15.9084
100	Q9H2X6	HIPK2_HUMAN	+	10.1053/jhep.2002.33205	10.1038/ncb715 ; PMID: 14678985
101	Q9H492	MLP3A_HUMAN	+	10.1371/journal.pone.0113089
102	Q9NPG3	UBN1_HUMAN	+	10.1128/mcb.01047-08
103	Q9NS56	TOPRS_HUMAN	+	10.1086/521953 ; 10.1016/j.bbagrm.2020.194518	10.1093/nar/gkac009
104	Q9UBQ5	EIF3K_HUMAN	+	10.1016/j.yexcr.2013.09.001
105	Q9UBW7	ZMYM2_HUMAN	+	10.1016/j.yexcr.2006.06.037
106	Q9UER7	DAXX_HUMAN	+	10.1128/JVI.00426-16
107	Q9UK99	FBX3_HUMAN	+	10.1128/MCB.00897-08
108	Q9UKL3	C8AP2_HUMAN	+	10.1038/sj.emboj.7601504
109	Q9UPN9	TRI33_HUMAN	+	10.15252/embj.2022112058	10.1038/s41467-021-26807-6 (U2OS)
110	Q9Y2D5	ASF1A_HUMAN	+	10.1371/journal.pone.0017036
111	Q9Y6D9	MD1L1_HUMAN	+	10.1038/s41467-019-09471-9
112	Q14209	E2F2_HUMAN	+	10.1101/gad.1975111
113	Q86UA6-2	RIP_HUMAN	+	10.1128/MCB.25.18.8202–8214.2005
114	O96006	ZBED1_HUMAN	+	10.1002/1873-3468.13680
115	P15927	RFA2_HUMAN	+	10.1016/s0960-9822(03)00376-2
116	Q13342	SP140_HUMAN	+	10.1128/MCB.19.6.4423	10.1074/jbc.271.46.29198
117	Q9HB58	SP110_HUMAN	+	10.1128/MCB.20.16.6138-6146.2000
118	Q6PCD5	RFWD3_HUMAN	+	10.1074/jbc.M111.222802
119	Q12980	NPRL3_HUMAN	+	10.1016/j.bbrc.2009.08.027
120	Q13472	TOP3A_HUMAN	+	10.1242/jcs.02965	Online ISSN: 1538-7445 ; Print ISSN: 0008-5472 ; "Association of the Bloom Syndrome Protein with Topoisomerase IIIα in Somatic and Meiotic Cells"
121	P11388	TOP2A_HUMAN	+	10.1093/nar/gky1295
122	Q8WWW0	RASF5_HUMAN	+	10.18297/etd/2539
123	P98177	FOXO4_HUMAN	+	10.1128/jvi.00546-22
124	Q04671	P_HUMAN	+	10.1128/JVI.72.5.3819-3826.1998
125	O15350	P73_HUMAN	+	10.1084/jem.20031943
126	Q5SSJ5	HP1B3_HUMAN	+	10.1371/journal.pone.0017036
127	Q9Y2M5	KLH20_HUMAN	+/-	10.1038/emboj.2010.62
128	Q9GZV1	ANKR2_HUMAN	+/-	10.1016/s0022-2836(04)00389-4
129	Q13207	TBX2_HUMAN	+/-	10.1038/emboj.2011.370	10.1128/JVI.01803-12
130	O14746	TERT_HUMAN	+/-	10.1242/jcs.048066
131	O15164	TIF1A_HUMAN	+/-	10.1038/s41467-021-26807-6
132	O75928	PIAS2_HUMAN	+/-	10.1128/JVI.00426-16 ; 10.1038/s41467-021-26807-6 (U2OS)
133	P02549	SPTA1_HUMAN	+/-	10.1074/jbc.M009307200
134	P05412	JUN_HUMAN	+/-	10.1182/blood-2004-09-3782
135	P08047	SP1_HUMAN	+/-	10.1371/journal.pone.0094450
136	P09874	PARP1_HUMAN	+/-	10.1096/fj.201801379R
137	P15976	GATA1_HUMAN	+/-	10.1182/blood-2013-02-483289
138	P16104	H2AX_HUMAN	+/-	10.1128/MCB.25.20.8925-8937.2005	10.1038/sj/ onc/1205227
139	P18887	XRCC1_HUMAN	+/-	10.1096/fj.201801379R
140	P20700	LMNB1_HUMAN	+/-	10.15252/emmm.201607315
141	P43004	EAA2_HUMAN	+/-	10.1074/jbc.M704314200
142	P48730	KC1D_HUMAN	+/-	10.1038/sj.onc.1211036
143	P50402	EMD_HUMAN	+/-	10.15252/emmm.201607315
144	P54198	HIRA_HUMAN	+/-	10.1101/2021.11.30.470516	10.1371/journal.pone.0017036
145	P61964	WDR5_HUMAN	+/-	10.1128/MCB.00906-09
146	P63208	SKP1_HUMAN	+/-	Johnson, F. B., Lombard, D. B., Neff, N. F., Mastrangelo, M. A., Dewolf, W., Ellis, N. A., ... & Guarente, L. (2000). Association of the Bloom syndrome protein with topoisomerase IIIα in somatic and meiotic cells. Cancer research, 60(5), 1162-1167.	Online ISSN: 1538-7445 ; Print ISSN: 0008-5472 ; "Association of the Bloom Syndrome Protein with Topoisomerase IIIα in Somatic and Meiotic Cells"
147	P67870	CSK2B_HUMAN	+/-	10.7314/APJCP.2014.15.19.8019
148	P68400	CSK21_HUMAN	+/-	10.7314/APJCP.2014.15.19.8019
149	P78347	GTF2I_HUMAN	+/-	10.1038/s41467-021-26807-6
150	Q00987	MDM2_HUMAN	+/-	10.1038/ncb1147	10.1038/onc.2012.332 ; 10.1242/jcs.00714
151	Q01826	SATB1_HUMAN	+/-	10.1074/jbc.M800512200
152	Q02447	SP3_HUMAN	+/-	10.1093/emboj/cdf510	10.1091/mbc.E05–11–1063 ; 10.1016/S1097-2765(02)00682-2
153	Q08999	RBL2_HUMAN	+/-	10.1128/MCB.18.2.1084	10.1016/j.molcel.2006.02.016
154	Q12778	FOXO1_HUMAN	+/-	10.1016/j.cmet.2005.08.004
155	Q12888	TP53B_HUMAN	+/-	10.1182/blood-2017-07-794784
156	Q13495	MAMD1_HUMAN	+/-	10.1038/82644
157	Q13526	PIN1_HUMAN	+/-	10.1128%2FMCB.01848-07
158	Q13569	TDG_HUMAN	+/-	10.1074/jbc.m408130200
159	Q14191	WRN_HUMAN	+/-	10.1074/jbc.M210479200
160	Q14790	CASP8_HUMAN	+/-	10.1016/j.cyto.2019.05.008
161	Q15554	TERF2_HUMAN	+/-	10.1242/jcs.148296
162	Q15759	MK11_HUMAN	+/-	10.1074/jbc.M407369200
163	Q16254	E2F4_HUMAN	+/-	10.1038/emboj.2011.370	10.1101/gad.1975111
164	Q16666	IF16_HUMAN	+/-	10.1128/JVI.00057-18	10.1128/JVI.02249-15
165	Q6N021	TET2_HUMAN	+/-	10.1158/0008-5472.CAN-17-3091
166	Q6VMQ6	MCAF1_HUMAN	+/-	10.1371/journal.pone.0068478
167	Q6ZNA4	RN111_HUMAN	+/-	10.1128/MCB.00036-14
168	Q86WT6	TRI69_HUMAN	+/-	10.3389/fonc.2012.00204
169	Q8IUQ4	SIAH1_HUMAN	+/-	10.1128/JVI.02207-10
170	Q8IX21	SLF2_HUMAN	+/-	10.7554/eLife.79676
171	Q8N2W9	PIAS4_HUMAN	+/-	10.1128/jvi.00426-16
172	Q8N7H5	PAF1_HUMAN	+/-	10.1128/MCB.00135-21
173	Q92547	TOPB1_HUMAN	+/-	10.1128/MCB.23.12.4247-4256.2003
174	Q92794	KAT6A_HUMAN	+/-	10.1073/pnas.1300490110	10.1093/nar/gkaa828
175	Q96L91	EP400_HUMAN	+/-	10.1002/1873-3468.13680	10.1128/mbio.00390-18
176	Q96RL1	UIMC1_HUMAN	+/-	10.1182/blood-2017-07-794784
177	Q96T88	UHRF1_HUMAN	+/-	10.1038/onc.2012.406
178	Q99613	EIF3C_HUMAN	+/-	10.1016/j.yexcr.2013.09.001
179	Q15911	ZFHX3_HUMAN	+/-	10.1371/journal.pone.0092746
180	P58012	FOXL2_HUMAN	+/-	10.1371/journal.pone.0025463
181	Q8IYW5	RN168_HUMAN	+/-	10.1242/jcs.176446
182	Q8IX07	FOG1_HUMAN	+/-	10.1182/blood-2013-02-483289
183	P06748	NPM_HUMAN	+/-	10.18632/aging.102248
184	Q08211	DHX9_HUMAN	+/-	10.18632/aging.102248
185	Q14974	IMB1_HUMAN	+/-	10.1080/19491034.2017.1306161
186	Q06323	PSME1_HUMAN	+/-	10.1084/jem.193.12.1361
187	Q9UL46	PSME2_HUMAN	+/-	10.1084/jem.193.12.1361
188	Q9UK97	FBX9_HUMAN	+/-	Snollaerts, T. (2016). Identification of new regulators for PML Nuclear Bodies (Doctoral dissertation, Paris 6).
189	P42575	CASP2_HUMAN	+/-	10.4161/cbt.4.6.1729
190	Q9HBH9	MKNK2_HUMAN	+/-	10.1128/MCB.23.16.5692–5705.2003
191	Q13535	ATR_HUMAN	+/-	10.1016/s0960-9822(03)00376-2
192	P50750	CDK9_HUMAN	+/-	10.1128/MCB.01557-07
193	P60484	PTEN_HUMAN	+/-	10.1038/nature07290
194	Q96A56	T53I1_HUMAN	+/-	10.1074/jbc.M301979200
195	O43566	RGS14_HUMAN	+/-	10.1074/jbc.M408163200
196	Q8NG50	RDM1_HUMAN	+/-	10.1093/nar/gkm753
197	Q96AZ6	ISG20_HUMAN	+/-	10.1074/jbc.272.31.19457
198	O43293	DAPK3_HUMAN	+/-	10.1128/MCB.23.17.6174–6186.2003
199	O75113	N4BP1_HUMAN	+/-	10.1242/jcs.060160
200	P38398	BRCA1_HUMAN	+/-	10.1128/MCB.23.12.4247–4256.2003
201	P46100	ATRX_HUMAN	+/-	10.1242/jcs.02965
202	Q06609	RAD51_HUMAN	+/-	10.1128/MCB.23.12.4247–4256.2003
203	Q92878	RAD50_HUMAN	+/-	10.1128/MCB.23.12.4247–4256.2003
204	Q99638	RAD9A_HUMAN	+/-	10.1128/MCB.23.12.4247–4256.2003
205	Q13315	ATM_HUMAN	+/-	10.1128/MCB.23.12.4247–4256.2003
